# Supplementary material for: Traditional Chinese Medicine Formula Kang Shuai Lao Pian Improves Obesity, Gut Dysbiosis, and Fecal Metabolic Disorders in High-Fat Diet-Fed Mice
Source: Front Pharmacol. 2020 Mar 25;11:297. doi: 10.3389/fphar.2020.00297 (PMC7109517; doi:10.3389/fphar.2020.00297)
Supplement: Supplementary Table 4 — The metabolites in response to both the factors of HFD and KSLP. [file Table_4.xlsx]

## Sheet: Sheet1
The metabolites in response to both the factors of HFD and KSLP
Heat map of statistically significant biochemicals profiled in this study. Red and green shaded cells indicate p≤0.05 (red indicates that the mean values are significantly higher for that comparison; green values significantly lower). Light red and light green shaded cells indicate 0.05<p<0.10 (light red indicates that the mean values trend higher for that comparison; light green values trend low…
					Fold of Change						Statistical Values						Mean Values
					ND_K	HFD_K	HFD	HFD Main Effect	KSLP Main Effect		ND_K	HFD_K	HFD	HFD Main Effect	KSLP Main Effect		ND	HFD	ND_K	HFD_K		Super Pathway	Sub Pathway	Chemical ID	CAS	RI	Mass
				X						X	ND	HFD	ND			X					X
Pathway Sort Order	Super Pathway	Sub Pathway	Biochemical Name	X	ND	HFD	ND			X	p-value	p-value	p-value	p-value	p-value	X					X
5	Amino Acid	Glycine, Serine and Threonine Metabolism	dimethylglycine		1.78	1.93	0.17				0.0372	0.0135	2.4316e-06	5.2915e-09	0.0026		1.9817	0.3435	3.5313	0.6641		Amino Acid	Glycine, Serine and Threonine Metabolism	806	1118-68-9	1104	104.071
31		Alanine and Aspartate Metabolism	N-methylalanine		1.61	1.45	0.09				0.1365	0.0347	1.1944e-09	1.264e-12	0.0164		2.7413	0.2588	4.4036	0.3754		Amino Acid	Alanine and Aspartate Metabolism	100001823	600-21-5	1580	104.071
56		Glutamate Metabolism	carboxyethyl-GABA		1.63	1.21	0.12				0.0398	0.319	6.0965e-10	1.04e-13	0.0278		0.7506	0.0931	1.2259	0.1131		Amino Acid	Glutamate Metabolism	100003260	4386-03-02	2085	176.092
108		Lysine Metabolism	N6,N6,N6-trimethyllysine		0.7	0.54	2.82				0.3158	0.0248	0.0017	0.0002	0.0325		0.4043	1.1403	0.281	0.6142		Amino Acid	Lysine Metabolism	189	23284-33-5	2825	189.16
128		Lysine Metabolism	N,N,N-trimethyl-5-aminovalerate		1.23	1.31	0.34				0.1843	0.0317	6.1379e-08	1.4917e-10	0.021		2.1107	0.714	2.5873	0.9381		Amino Acid	Lysine Metabolism	100015962		2186	160.133
145		Phenylalanine Metabolism	3-hydroxyphenylacetate		0.82	0.56	0.14				0.465	0.0148	1.6113e-08	3.683e-12	0.0386		1.5173	0.2088	1.2487	0.1175		Amino Acid	Phenylalanine Metabolism	114	621-37-4	1220	151.04
161		Tyrosine Metabolism	tyrosol		0.24	0.94	0.29				0.0015	0.7699	0.0022	0.0342	0.0059		1.8804	0.5457	0.4467	0.5133		Amino Acid	Tyrosine Metabolism	100003493	501-94-0	2716	137.061
198		Tyrosine Metabolism	gentisate		0.41	0.56	0.45				0.072	0.0723	0.0552	0.0183	0.0145		1.1553	0.5248	0.4687	0.2958		Amino Acid	Tyrosine Metabolism	100000447	490-79-9	905	153.019
247		Tryptophan Metabolism	xanthurenate		0.64	0.4	2.8				0.2704	0.0061	0.0314	0.0289	0.0117		1.1677	3.2652	0.7522	1.304		Amino Acid	Tryptophan Metabolism	100000015	59-007	1476	204.03
251		Tryptophan Metabolism	picolinate		0.68	0.71	0.44				0.0607	0.0577	9.8117e-05	1.6697e-06	0.0106		0.9105	0.4017	0.6161	0.2841		Amino Acid	Tryptophan Metabolism	1022	98-98-6	910	124.039
267		Tryptophan Metabolism	indolepropionate		0.61	0.64	0.57				0.1246	0.1237	0.0179	0.0028	0.0352		1.2929	0.731	0.7852	0.4665		Amino Acid	Tryptophan Metabolism	100001083	830-96-6	2795	188.072
287		Leucine, Isoleucine and Valine Metabolism	N-acetylleucine		0.66	0.62	2.78				0.2853	0.0607	0.0121	0.0017	0.0499		0.4119	1.145	0.2698	0.7114		Amino Acid	Leucine, Isoleucine and Valine Metabolism	1082	1188-21-2	2400	172.098
332		Leucine, Isoleucine and Valine Metabolism	1-carboxyethylisoleucine		0.36	0.53	2.48				0.148	0.0971	0.0606	0.0071	0.035		0.2932	0.7266	0.1059	0.3829		Amino Acid	Leucine, Isoleucine and Valine Metabolism	100020427		2628	202.108
467		Polyamine Metabolism	N('1)-acetylspermidine		0.8	0.56	0.65				0.2987	0.0016	0.0313	0.0001	0.006		0.98	0.6401	0.7841	0.3606		Amino Acid	Polyamine Metabolism	187	14278-49-0	3075	188.176
481		Guanidino and Acetamido Metabolism	1-methylguanidine		0.71	0.69	0.78				0.1099	0.131	0.0733	0.0297	0.0327		0.594	0.4623	0.4235	0.3211		Amino Acid	Guanidino and Acetamido Metabolism	100000715	22661-87-6	2149	74.0713
740	Peptide	Dipeptide	histidylalanine		1	0.16	14.33				1	0.0011	0.0001	0.0003	0.0324		0.3316	4.7532	0.3316	0.7686		Peptide	Dipeptide	100003542	16874-75-2	3014	227.114
798		Dipeptide	lysylleucine		0.42	0.95	1.83				0.0069	0.7199	0.0247	1.1516e-05	0.0169		0.6703	1.2249	0.2809	1.1631		Peptide	Dipeptide	100003196	7369-79-1	3370	260.197
832		Dipeptide	phenylalanylglycine		0.49	0.38	10.15				0.1278	0.026	9.402e-06	5.5203e-08	0.0127		0.7467	7.5816	0.3664	2.8959		Peptide	Dipeptide	100003588	721-90-4	2898	223.108
935		Dipeptide	valylglycine		0.56	0.8	2.26				0.047	0.324	0.0046	1.2522e-05	0.0323		0.6735	1.5233	0.3781	1.2157		Peptide	Dipeptide	100003641	686-43-1	2444	175.108
948		Dipeptide	leucylglutamine*		0.5	0.54	13.89				0.1263	0.1152	2.2508e-07	2.4398e-10	0.0339		0.2542	3.53	0.1276	1.8922		Peptide	Dipeptide	100003183		2620	260.161
1032		Acetylated Peptides	phenylacetylglutamine		0.42	1	0.27				0.0035	1	2.4602e-05	5.4006e-05	0.0169		0.8469	0.2267	0.3567	0.2267		Peptide	Acetylated Peptides	100001417	28047-15-6	2330	263.104
1068	Carbohydrate	Glycolysis, Gluconeogenesis, and Pyruvate Metabolism	glucose 6-phosphate		0.73	1	0.73				0.011	1	0.0054	0.0386	0.0386		0.0191	0.0139	0.0139	0.0139		Carbohydrate	Glycolysis, Gluconeogenesis, and Pyruvate Metabolism	291	103192-55-8	4537	259.022
1237		Aminosugar Metabolism	glucosamine-6-phosphate		0.48	1	0.48				0.011	1	0.0055	0.0387	0.0387		0.0402	0.0194	0.0194	0.0194		Carbohydrate	Aminosugar Metabolism	290	3616-42-0	4521.5	258.038
1299	Energy	Oxidative Phosphorylation	phosphate		3.4	2.07	0.26				0.1114	0.2249	0.0081	9.8845e-05	0.0496		0.9687	0.255	3.2894	0.5271		Energy	Oxidative Phosphorylation	461	7664-38-2	608	96.9696
1301	Lipid	Fatty Acid Synthesis	malonylcarnitine		0.53	0.65	8.88				0.0904	0.1817	1.2945e-07	7.5982e-11	0.035		0.1529	1.3575	0.0805	0.8833		Lipid	Fatty Acid Synthesis	100001526	853728-01-5	2086	248.113
1332		Long Chain Saturated Fatty Acid	pentadecanoate (15:0)		1.57	1.46	0.73				0.1551	0.0968	0.1678	0.0425	0.0365		0.7419	0.5403	1.1611	0.7877		Lipid	Long Chain Saturated Fatty Acid	980	1002-84-2;10002-84-2	5521	241.217
1374		Long Chain Polyunsaturated Fatty Acid (n3 and n6)	stearidonate (18:4n3)		1.94	0.39	0.86				0.8906	0.0028	0.6563	0.0171	0.0427		1.1497	0.9915	2.2344	0.3915		Lipid	Long Chain Polyunsaturated Fatty Acid (n3 and n6)	100001229	111174-40-4	5395	275.202
1389		Long Chain Polyunsaturated Fatty Acid (n3 and n6)	dihomo-linolenate (20:3n3 or n6)		0.99	0.51	2.23				0.5581	0.006	0.0134	0.022	0.03		0.3885	0.866	0.3857	0.4449		Lipid	Long Chain Polyunsaturated Fatty Acid (n3 and n6)	100001739	17046-59-2	5596	305.249
1443		Fatty Acid, Branched	isocaproate (i6:0)		0.6	0.82	0.32				0.0309	0.4815	4.7163e-05	7.3331e-06	0.0337		1.7397	0.5621	1.0381	0.4582		Lipid	Fatty Acid, Branched	100000806	646-07-1	2570	115.076
1448		Fatty Acid, Branched	18-methylnonadecanoate (i20:0)		2.06	2.83	2.92				0.5638	0.013	0.0676	0.0007	0.0464		0.3005	0.8762	0.618	2.4811		Lipid	Fatty Acid, Branched	100019953		6170	311.296
1449		Fatty Acid, Branched	(12 or 13)-methylmyristate (a15:0 or i15:0)		1.02	2.56	0.19				0.8052	3.3187e-05	1.2469e-07	6.5508e-08	0.0029		1.5583	0.3037	1.5845	0.7761		Lipid	Fatty Acid, Branched	100002344	2485-71-4	5499	241.217
1492		Fatty Acid, Dicarboxylate	azelate (C9-DC)		0.49	1.05	0.04				0.0004	0.9259	0	0	0.0036		16.5141	0.7202	8.0733	0.755		Lipid	Fatty Acid, Dicarboxylate	2029	123-99-9	1276	187.098
1512		Fatty Acid, Dicarboxylate	octadecenedioate (C18:1-DC)*		1.72	1.53	0.06				0.017	0.0056	6.8e-14	0	0.0007		4.5793	0.2908	7.8557	0.4457		Lipid	Fatty Acid, Dicarboxylate	100019978		4875	311.223
1639		Fatty Acid Metabolism (Acyl Carnitine, Long Chain Saturated)	lignoceroylcarnitine (C24)*		1.14	1.85	2.91				0.7089	0.0035	0.0054	3.3938e-06	0.0321		0.4019	1.1712	0.4589	2.1696		Lipid	Fatty Acid Metabolism (Acyl Carnitine, Long Chain Saturated)	100015834		1603	512.467
1716		Fatty Acid, Monohydroxy	2-hydroxyheptanoate*		0.49	0.94	0.25				0.001	0.8514	2.8505e-08	7.5859e-09	0.0049		2.3186	0.5793	1.1336	0.5449		Lipid	Fatty Acid, Monohydroxy	100019960		925	145.087
1724		Fatty Acid, Monohydroxy	2-hydroxyarachidate*		1.16	4.1	0.2				0.7444	0.0002	9.8307e-05	0.0003	0.0077		0.9339	0.1896	1.0815	0.7783		Lipid	Fatty Acid, Monohydroxy	100019892		5990	327.29
1725		Fatty Acid, Monohydroxy	2-hydroxybehenate		1.64	4.33	0.32				0.2563	0.0001	0.0014	0.0029	0.0012		0.6227	0.197	1.0222	0.8537		Lipid	Fatty Acid, Monohydroxy	100015637		6384	355.322
1726		Fatty Acid, Monohydroxy	2-hydroxylignocerate*		1.68	3.64	0.22				0.2943	0.0002	4.0345e-05	1.978e-05	0.0016		0.9728	0.2107	1.6307	0.7679		Lipid	Fatty Acid, Monohydroxy	100019894		710	383.353
1727		Fatty Acid, Monohydroxy	2-hydroxynervonate*		1.71	5.54	0.32				0.212	4.4857e-06	0.0006	0.006	0.0001		0.4321	0.1385	0.7405	0.7679		Lipid	Fatty Acid, Monohydroxy	100015638		6345	381.337
1907		Endocannabinoid	linolenoyl ethanolamide*		0.47	1	0.47				0.0009	1	0.0003	0.0062	0.0062		0.219	0.1019	0.1019	0.1019		Lipid	Endocannabinoid	100020840	57086-93-8	5715	320.26
1912		Endocannabinoid	lignoceroyl ethanolamide (24:0)*		1.19	3.82	1.86				0.5871	0.0004	0.2014	0.0006	0.0067		0.2798	0.5199	0.3316	1.9886		Lipid	Endocannabinoid	100015855		2445	412.415
2528		Monoacylglycerol	1-pentadecanoylglycerol (15:0)		1.76	1.74	0.56				0.0571	0.1985	0.1969	0.0133	0.0251		0.484	0.2716	0.8541	0.4717		Lipid	Monoacylglycerol	100001431	104140-07-0	6200	241.217
2588		Diacylglycerol	palmitoleoyl-linoleoyl-glycerol (16:1/18:2) [1]*		2.25	2.58	1.58				0.305	0.0025	0.4012	0.0221	0.0082		0.2152	0.3403	0.4837	0.8784		Lipid	Diacylglycerol	100010930		2664	608.525
2643		Galactosyl Glycerolipids	galactosylglycerol		0.73	0.64	2.89				0.2219	0.0151	0.0093	0.0022	0.0162		0.3572	1.0325	0.2605	0.6613		Lipid	Galactosyl Glycerolipids	100003064	16232-91-0	2518	299.098
2671		Sphingolipid Synthesis	3-ketosphinganine		1.32	3.28	0.21				0.4474	5.2505e-05	1.2094e-05	1.2723e-05	0.0014		1.1527	0.2455	1.5251	0.8053		Lipid	Sphingolipid Synthesis	100001436	18944-28-0	1400	300.29
2672		Sphingolipid Synthesis	sphinganine		1.58	1.79	3.13				0.0308	0.0002	2.1658e-06	1.0236e-09	0.0001		0.2954	0.9254	0.4661	1.6562		Lipid	Sphingolipid Synthesis	313	3102-56-5	1413	302.305
2674		Sphingolipid Synthesis	sphingadienine		1	2.29	2.2				1	1.1109e-05	0.0003	1.7517e-09	0.0024		0.3547	0.7786	0.3547	1.7834		Lipid	Sphingolipid Synthesis	100015643	25696-03-1	1350	298.274
2675		Sphingolipid Synthesis	phytosphingosine		1.18	1.72	2.67				0.4055	0.0008	2.3755e-05	3.5193e-09	0.0061		0.2023	0.5406	0.2396	0.9279		Lipid	Sphingolipid Synthesis	469	554-62-1	1367	318.3
2677		Sphingolipid Synthesis	hexadecasphinganine (d16:0)*		1.65	2.57	2.74				0.0355	2.7299e-06	3.6531e-05	3.1085e-09	1.2707e-05		0.4048	1.108	0.6676	2.8475		Lipid	Sphingolipid Synthesis	100015865		1300	274.274
2687		Ceramides	N-palmitoyl-phytosphingosine (t18:0/16:0)		1.55	1.71	0.64				0.0131	0.0002	0.0073	0.0012	7.864e-05		0.7062	0.4488	1.0928	0.7683		Lipid	Ceramides	100019761		2632	556.53
2690		Ceramides	N-stearoyl-sphingosine (d18:1/18:0)*		0.89	2.27	4				0.3261	7.1993e-09	1.0134e-11	0	0.0001		0.1031	0.4126	0.0917	0.9381		Lipid	Ceramides	1547	104404-17-3	3392	566.551
2691		Ceramides	N-oleoyl-sphingosine (d18:1/18:1)*		1.09	2.33	10.45				0.7938	3.5629e-05	1.8464e-09	2.9e-14	0.003		0.2441	2.5499	0.2668	5.9397		Lipid	Ceramides	100000631	5966-28-9	2848	564.535
2823		Sphingosines	sphingosine		1.06	2.26	3.49				0.6642	6.9913e-08	1.229e-09	3e-15	3.7798e-05		0.3505	1.2215	0.3715	2.761		Lipid	Sphingosines	297	123-78-4	1393	300.29
2831		Sphingosines	hexadecasphingosine (d16:1)*		0.97	2.6	12.88				0.9057	2.0556e-05	1.1699e-11	0	0.0044		0.0652	0.8396	0.0634	2.1811		Lipid	Sphingosines	100015723		1289	272.258
2832		Sphingosines	heptadecasphingosine (d17:1)		1.01	2.59	6.59				0.9451	1.4773e-06	3.7737e-10	2e-15	0.0006		0.3546	2.3361	0.3586	6.0612		Lipid	Sphingosines	100015724	6918-48-5	1377	286.274
2833		Sphingosines	eicosanoylsphingosine (d20:1)*		0.92	2.02	1.86				0.5202	1.7772e-06	0.0001	1.2814e-10	0.0028		0.6636	1.2331	0.611	2.4927		Lipid	Sphingosines	100015870		1443	328.321
2838		Sphingosines	N-stearoyl-phytosphingosine (t18:0/18:0)*		1.23	1.63	5.31				0.2353	0.0004	9.7854e-11	9e-15	0.0021		0.1005	0.5336	0.1238	0.8702		Lipid	Sphingosines	100021237		3020	584.561
2853		Sterol	lanosterol		1.13	2.53	0.02				0.4238	5.3206e-07	0	0	7.1385e-05		28.7495	0.5456	32.4517	1.3778		Lipid	Sterol	395	79-63-0	2687	409.383
2856		Sterol	cholesterol		0.99	1.76	2.21				0.9528	0.0012	0.0006	5.0657e-08	0.0316		0.3058	0.6749	0.3036	1.186		Lipid	Sterol	266	57-88-5	2707	369.352
2880		Sterol	4-cholesten-3-one		1.38	2.1	0.59				0.023	2.9403e-07	0.0002	0.0006	2.113e-06		1.3507	0.7981	1.8665	1.6762		Lipid	Sterol	100002227	601-57-0	2520	385.346
2881		Sterol	beta-sitosterol		1.41	1.25	0.52				0.0022	0.006	3.395e-07	1.2568e-10	0.0001		0.7671	0.3984	1.0849	0.4986		Lipid	Sterol	100001033	83-46-5	3054	397.383
2883		Sterol	stigmastadienone		1.2	1.3	0.31				0.0874	0.0041	1.495e-11	1.7e-14	0.0027		2.5433	0.7901	3.054	1.0235		Lipid	Sterol	100021199		2688	411.362
2884		Sterol	campesterol		1.38	1.33	0.67				0.0146	0.0049	0.0027	4.5558e-05	0.0006		0.6958	0.4667	0.9598	0.6213		Lipid	Sterol	100001269	474-62-4	2873	383.367
3092		Secondary Bile Acid Metabolism	3-dehydrodeoxycholate		1.33	1.3	1.67				0.2595	0.0521	0.079	0.007	0.041		1.0692	1.7856	1.4219	2.3258		Lipid	Secondary Bile Acid Metabolism	100020860	4185-01-07	5235	389.27
3098		Secondary Bile Acid Metabolism	lithocholate		1.25	1.59	2.25				0.4666	0.0206	0.0177	0.0001	0.0467		0.8531	1.9236	1.0646	3.0577		Lipid	Secondary Bile Acid Metabolism	405	434-13-9	5372	375.29
3100		Secondary Bile Acid Metabolism	12-ketolithocholate		1.26	1.34	1.52				0.3444	0.0413	0.1317	0.0105	0.0486		1.2301	1.8731	1.551	2.505		Lipid	Secondary Bile Acid Metabolism	100020859	5130-29-0	5130	389.27
3122		Secondary Bile Acid Metabolism	dehydrolithocholate		1.39	1.94	2.23				0.2679	0.0022	0.0323	0.0002	0.0063		0.9922	2.2166	1.3828	4.2928		Lipid	Secondary Bile Acid Metabolism	100001067	1553-56-6	5360	373.275
3141		Secondary Bile Acid Metabolism	3b-hydroxy-5-cholenoic acid		1.38	2.11	2.14				0.2069	0.0002	0.0022	9.6334e-07	0.001		0.7914	1.6899	1.0935	3.5666		Lipid	Secondary Bile Acid Metabolism	100004182	5255-17-4	5205	373.275
3723	Nucleotide	Purine Metabolism, (Hypo)Xanthine/Inosine containing	2'-deoxyinosine		1.25	1.84	0.09				0.5647	0.0033	3.2806e-10	2.336e-12	0.0217		2.061	0.1935	2.5691	0.3551		Nucleotide	Purine Metabolism, (Hypo)Xanthine/Inosine containing	100000135	890-38-0	1688	251.079
3747		Purine Metabolism, Adenine containing	N6-methyladenosine		1.13	1.91	0.26				0.6775	0.0023	1.2284e-05	2.7087e-06	0.0237		3.2071	0.8398	3.6392	1.6037		Nucleotide	Purine Metabolism, Adenine containing	213	1867-73-8	2264	282.12
3762		Purine Metabolism, Adenine containing	2'-deoxyadenosine		3.61	1.53	0.61				0.0039	0.0858	0.2629	0.0051	0.0014		2.327	1.4089	8.4042	2.152		Nucleotide	Purine Metabolism, Adenine containing	211	16373-93-6	2252	252.109
3792		Purine Metabolism, Guanine containing	2'-deoxyguanosine		1.65	1.85	0.23				0.1444	0.015	1.4225e-05	1.4785e-07	0.0102		1.9251	0.4397	3.1685	0.8144		Nucleotide	Purine Metabolism, Guanine containing	348	961-07-9	1700	266.089
3812		Pyrimidine Metabolism, Uracil containing	5,6-dihydrouridine		1.09	1.43	0.5				0.6415	0.0104	7.7384e-05	1.2644e-05	0.0494		1.1603	0.5745	1.2621	0.8195		Nucleotide	Pyrimidine Metabolism, Uracil containing	100001425	5627-05-04	1119	245.078
3874		Dinucleotide	(3'-5')-cytidylyladenosine		2.69	1.3	0.47				0.0068	0.6804	0.0264	1.3819e-05	0.0156		0.9637	0.4491	2.5903	0.5817		Nucleotide	Dinucleotide	100009061	2382-66-3	1754	571.131
3909	Cofactors and Vitamins	Nicotinate and Nicotinamide Metabolism	N1-Methyl-4-pyridone-3-carboxamide		0.32	0.97	3.42				0.0003	0.6889	1.9139e-05	1.9493e-10	0.0016		0.533	1.8204	0.1729	1.7642		Cofactors and Vitamins	Nicotinate and Nicotinamide Metabolism	100001469	769-49-3	1260	153.066
3947		Tocopherol Metabolism	gamma-CEHC		1	0.5	14.38				1	0.0018	5.5967e-10	1.1766e-11	0.0423		0.1659	2.3858	0.1659	1.1959		Cofactors and Vitamins	Tocopherol Metabolism	100002094	178167-75-4	3843	263.129
3985		Hemoglobin and Porphyrin Metabolism血红蛋白和卟啉代谢	bilirubin (E,E)*		1.19	3.3	1.27				0.7171	0.0007	0.7115	0.015	0.0135		0.5001	0.633	0.5936	2.0914		Cofactors and Vitamins	Hemoglobin and Porphyrin Metabolism	100001950		1045	585.271
3987		Hemoglobin and Porphyrin Metabolism血红蛋白和卟啉代谢	biliverdin		1.58	4.14	2.39				0.3946	0.0009	0.2242	0.0024	0.0063		0.6415	1.5332	1.012	6.3487		Cofactors and Vitamins	Hemoglobin and Porphyrin Metabolism	250	55482-27-4;55482-27-4	1016	583.255
3989		Hemoglobin and Porphyrin Metabolism血红蛋白和卟啉代谢	D-urobilin		1.86	1.84	3.4				0.1159	0.0388	0.0198	0.0014	0.0149		0.5657	1.9209	1.0531	3.536		Cofactors and Vitamins	Hemoglobin and Porphyrin Metabolism	100002569	3947-38-4	935	589.302
4000		Thiamine Metabolism	hydroxymethylpyrimidine		0.97	2.89	0.07				0.8888	8.9845e-05	7.3421e-10	4.6976e-11	0.0064		1.5345	0.1069	1.485	0.3091		Cofactors and Vitamins	Thiamine Metabolism	100003365	73-67-6	2207	140.082
4006		Vitamin A Metabolism	carotene diol (1)		1.25	1	0.45				0.0041	1	1.4319e-10	4e-15	0.019		0.704	0.3183	0.882	0.3183		Cofactors and Vitamins	Vitamin A Metabolism	100015966		1720	568.428
4007		Vitamin A Metabolism	carotene diol (2)		1.3	1	0.22				0.0029	1	1e-15	0	0.0146		0.7515	0.1648	0.9784	0.1648		Cofactors and Vitamins	Vitamin A Metabolism	100015967		1904	568.428
4010		Vitamin A Metabolism	beta-cryptoxanthin		1.28	1	0.86				0.0048	1	0.0568	1.9892e-05	0.021		0.4737	0.4079	0.6059	0.4079		Cofactors and Vitamins	Vitamin A Metabolism	100001977	472-70-8	2560	552.433
4018		Vitamin B6 Metabolism	pyridoxine (Vitamin B6)		0.59	1	0.3				1.6629e-05	1	9.19e-13	8.1e-14	0.0003		1.4572	0.4306	0.8526	0.4306		Cofactors and Vitamins	Vitamin B6 Metabolism	936	58-56-0	2442	170.081
4079	Xenobiotics	4-ethylphenylsulfate	4-ethylphenylsulfate		0.49	1	0.49				0.0133	1	0.0067	0.0443	0.0443		0.6089	0.2966	0.2966	0.2966		Xenobiotics	Benzoate Metabolism	100001756	123-07-9	3580	201.023
4233		Food Component/Plant	vanillate		0.78	0.66	0.65				0.3017	0.0396	0.0196	0.0005	0.0408		1.2083	0.7851	0.9471	0.5219		Xenobiotics	Food Component/Plant	100001634	121-34-6	1100	167.035
4252		Food Component/Plant	2-pyrrolidineacetic acid		3.42	3.15	0.12				0.0017	0.0015	2.4844e-07	1.4072e-10	4.4894e-05		1.7155	0.1982	5.8607	0.6235		Xenobiotics	Food Component/Plant	100006441	56879-46-0	2248	130.086
4340		Food Component/Plant	daidzein		0.6	0.2	0.06				0.276	0.0025	7.0536e-08	1.3719e-11	0.0072		1.8202	0.1167	1.088	0.0228		Xenobiotics	Food Component/Plant	100001219	486-66-8	3566	253.051
4343		Food Component/Plant	genistein sulfate*		0.15	0.95	0.02				6.0489e-06	0.8959	2.7966e-09	8.2381e-09	9.6669e-05		2.8626	0.0676	0.4279	0.0643		Xenobiotics	Food Component/Plant	100020207		3616	349.002
4354		Food Component/Plant	equol		0.47	1	0.23				2.2182e-05	1	2.0807e-10	1.0293e-10	0.0003		1.1046	0.2534	0.5243	0.2534		Xenobiotics	Food Component/Plant	100001725	531-95-3;94105-90-5	4565	241.087
4356		Food Component/Plant	equol sulfate		0.37	1	0.2				1.2855e-07	1	6.893e-12	1.5017e-11	4.6372e-06		1.5168	0.2989	0.5634	0.2989		Xenobiotics	Food Component/Plant	100003429		3630	321.044
4417		Food Component/Plant	mannonate*		0.54	1	0.16				0.001	0.9734	5.3014e-11	2.259e-12	0.006		0.0817	0.0129	0.0439	0.0129		Xenobiotics	Food Component/Plant	100003695	642-99-9	2736	195.051
4443		Food Component/Plant	pheophytin A		1.74	1	0.33				1.1881e-05	1	1.1887e-10	0	0.0002		0.7955	0.2617	1.3846	0.2617		Xenobiotics	Food Component/Plant	100001827	603-17-8	3176	871.573
4562		Food Component/Plant	daidzein sulfate (2)		0.14	1	0.07				8.492e-08	1	2.6501e-10	5.1623e-09	3.242e-06		4.2582	0.3076	0.5927	0.3076		Xenobiotics	Food Component/Plant	100006363		3330	333.008
4656		Bacterial/Fungal	lactobacillic acid		2	1.36	4.12				0.006	0.1718	4.1595e-07	1.7326e-08	0.0035		0.3162	1.3036	0.6313	1.7708		Xenobiotics	Bacterial/Fungal	100021065	503-06-0	5822	295.264
5086		Drug - Topical Agents	2,6-dihydroxybenzoic acid		0.41	1	0.09				5.978e-05	1	1.65e-13	5e-15	0.0007		0.5063	0.0454	0.2066	0.0454		Xenobiotics	Drug - Topical Agents	100020837	303-07-1	729	153.019
