# Supplementary material for: Traditional Chinese Medicine Formula Kang Shuai Lao Pian Improves Obesity, Gut Dysbiosis, and Fecal Metabolic Disorders in High-Fat Diet-Fed Mice
Source: Front Pharmacol. 2020 Mar 25;11:297. doi: 10.3389/fphar.2020.00297 (PMC7109517; doi:10.3389/fphar.2020.00297)
Supplement: Supplementary Table 5 — The metabolites in response to both the factors of HFD and KSLP, in which can be reversed by KSLP. [file Table_5.xlsx]

## Sheet: Sheet1
The metabolites in response to both the factors of HFD and KSLP, in which can be reversed by KSLP.
Heat map of statistically significant biochemicals profiled in this study. Red and green shaded cells indicate p≤0.05 (red indicates that the mean values are significantly higher for that comparison; green values significantly lower). Light red and light green shaded cells indicate 0.05<p<0.10 (light red indicates that the mean values trend higher for that comparison; light green values trend low…
					Fold of Change						Statistical Values						Mean Values
					ND_K	HFD_K	HFD	HFD Main Effect	KSLP Main Effect		ND_K	HFD_K	HFD	HFD Main Effect	KSLP Main Effect		ND	HFD	ND_K	HFD_K		Super Pathway	Sub Pathway	Chemical ID	CAS	RI	Mass
				X						X	ND	HFD	ND			X					X
Pathway Sort Order	Super Pathway	Sub Pathway	Biochemical Name	X	ND	HFD	ND			X	p-value	p-value	p-value	p-value	p-value	X					X
31	Amino Acid	Alanine and Aspartate Metabolism	N-methylalanine		1.61	1.45	0.09				0.1365	0.0347	1.1944e-09	1.264e-12	0.0164		2.7413	0.2588	4.4036	0.3754		Amino Acid	Alanine and Aspartate Metabolism	100001823	600-21-5	1580	104.071
108		Lysine Metabolism	N6,N6,N6-trimethyllysine		0.7	0.54	2.82				0.3158	0.0248	0.0017	0.0002	0.0325		0.4043	1.1403	0.281	0.6142		Amino Acid	Lysine Metabolism	189	23284-33-5	2825	189.16
128		Lysine Metabolism	N,N,N-trimethyl-5-aminovalerate		1.23	1.31	0.34				0.1843	0.0317	6.1379e-08	1.4917e-10	0.021		2.1107	0.714	2.5873	0.9381		Amino Acid	Lysine Metabolism	100015962		2186	160.133
247		Tryptophan Metabolism	xanthurenate		0.64	0.4	2.8				0.2704	0.0061	0.0314	0.0289	0.0117		1.1677	3.2652	0.7522	1.304		Amino Acid	Tryptophan Metabolism	100000015	59-007	1476	204.03
740	Peptide	Dipeptide	histidylalanine		1	0.16	14.33				1	0.0011	0.0001	0.0003	0.0324		0.3316	4.7532	0.3316	0.7686		Peptide	Dipeptide	100003542	16874-75-2	3014	227.114
832		Dipeptide	phenylalanylglycine		0.49	0.38	10.15				0.1278	0.026	9.402e-06	5.5203e-08	0.0127		0.7467	7.5816	0.3664	2.8959		Peptide	Dipeptide	100003588	721-90-4	2898	223.108
1389	Lipid	Long Chain Polyunsaturated Fatty Acid (n3 and n6)	dihomo-linolenate (20:3n3 or n6)		0.99	0.51	2.23				0.5581	0.006	0.0134	0.022	0.03		0.3885	0.866	0.3857	0.4449		Lipid	Long Chain Polyunsaturated Fatty Acid (n3 and n6)	100001739	17046-59-2	5596	305.249
1449		Fatty Acid, Branched	(12 or 13)-methylmyristate (a15:0 or i15:0)		1.02	2.56	0.19				0.8052	3.3187e-05	1.2469e-07	6.5508e-08	0.0029		1.5583	0.3037	1.5845	0.7761		Lipid	Fatty Acid, Branched	100002344	2485-71-4	5499	241.217
1724		Fatty Acid, Monohydroxy	2-hydroxyarachidate*		1.16	4.1	0.2				0.7444	0.0002	9.8307e-05	0.0003	0.0077		0.9339	0.1896	1.0815	0.7783		Lipid	Fatty Acid, Monohydroxy	100019892		5990	327.29
1725		Fatty Acid, Monohydroxy	2-hydroxybehenate		1.64	4.33	0.32				0.2563	0.0001	0.0014	0.0029	0.0012		0.6227	0.197	1.0222	0.8537		Lipid	Fatty Acid, Monohydroxy	100015637		6384	355.322
1726		Fatty Acid, Monohydroxy	2-hydroxylignocerate*		1.68	3.64	0.22				0.2943	0.0002	4.0345e-05	1.978e-05	0.0016		0.9728	0.2107	1.6307	0.7679		Lipid	Fatty Acid, Monohydroxy	100019894		710	383.353
1727		Fatty Acid, Monohydroxy	2-hydroxynervonate*		1.71	5.54	0.32				0.212	4.4857e-06	0.0006	0.006	0.0001		0.4321	0.1385	0.7405	0.7679		Lipid	Fatty Acid, Monohydroxy	100015638		6345	381.337
2643		Galactosyl Glycerolipids	galactosylglycerol		0.73	0.64	2.89				0.2219	0.0151	0.0093	0.0022	0.0162		0.3572	1.0325	0.2605	0.6613		Lipid	Galactosyl Glycerolipids	100003064	16232-91-0	2518	299.098
2671		Sphingolipid Synthesis	3-ketosphinganine		1.32	3.28	0.21				0.4474	5.2505e-05	1.2094e-05	1.2723e-05	0.0014		1.1527	0.2455	1.5251	0.8053		Lipid	Sphingolipid Synthesis	100001436	18944-28-0	1400	300.29
2853		Sterol	lanosterol		1.13	2.53	0.02				0.4238	5.3206e-07	0	0	7.1385e-05		28.7495	0.5456	32.4517	1.3778		Lipid	Sterol	395	79-63-0	2687	409.383
2883		Sterol	stigmastadienone		1.2	1.3	0.31				0.0874	0.0041	1.495e-11	1.7e-14	0.0027		2.5433	0.7901	3.054	1.0235		Lipid	Sterol	100021199		2688	411.362
3723	Nucleotide	Purine Metabolism, (Hypo)Xanthine/Inosine containing	2'-deoxyinosine		1.25	1.84	0.09				0.5647	0.0033	3.2806e-10	2.336e-12	0.0217		2.061	0.1935	2.5691	0.3551		Nucleotide	Purine Metabolism, (Hypo)Xanthine/Inosine containing	100000135	890-38-0	1688	251.079
3747		Purine Metabolism, Adenine containing	N6-methyladenosine		1.13	1.91	0.26				0.6775	0.0023	1.2284e-05	2.7087e-06	0.0237		3.2071	0.8398	3.6392	1.6037		Nucleotide	Purine Metabolism, Adenine containing	213	1867-73-8	2264	282.12
3792		Purine Metabolism, Guanine containing	2'-deoxyguanosine		1.65	1.85	0.23				0.1444	0.015	1.4225e-05	1.4785e-07	0.0102		1.9251	0.4397	3.1685	0.8144		Nucleotide	Purine Metabolism, Guanine containing	348	961-07-9	1700	266.089
3812		Pyrimidine Metabolism, Uracil containing	5,6-dihydrouridine		1.09	1.43	0.5				0.6415	0.0104	7.7384e-05	1.2644e-05	0.0494		1.1603	0.5745	1.2621	0.8195		Nucleotide	Pyrimidine Metabolism, Uracil containing	100001425	5627-05-04	1119	245.078
3947	Cofactors and Vitamins	Tocopherol Metabolism	gamma-CEHC		1	0.5	14.38				1	0.0018	5.5967e-10	1.1766e-11	0.0423		0.1659	2.3858	0.1659	1.1959		Cofactors and Vitamins	Tocopherol Metabolism	100002094	178167-75-4	3843	263.129
4000		Thiamine Metabolism	hydroxymethylpyrimidine		0.97	2.89	0.07				0.8888	8.9845e-05	7.3421e-10	4.6976e-11	0.0064		1.5345	0.1069	1.485	0.3091		Cofactors and Vitamins	Thiamine Metabolism	100003365	73-67-6	2207	140.082
